# Supplementary material for: Identification of an exosomal long non-coding RNAs panel for predicting recurrence risk in patients with colorectal cancer
Source: publisher site journal article supplement (doi:10.18632/aging.103006), 2020-04-04
Supplement: Supplementary file [file aging-v12i7-103006-supplementary-material-SD2.pdf]

## SUPPLEMENTARY TABLES

**Supplementary Table 1. Comparison of clinical characteristics between colorectal cancer patients with non-recurrence and recurrence in Discovery cohort.**

| Parameters                      | Discovery cohort |       |            |       | P value            |
|---------------------------------|------------------|-------|------------|-------|--------------------|
|                                 | Non-recurrence   |       | Recurrence |       |                    |
|                                 | No.              | %     | No.        | %     |                    |
| Age(year)                       | 60.7±8.34        |       | 62.8±9.16  |       | 0.510 <sup>a</sup> |
| Gender                          |                  |       |            |       | 0.712 <sup>b</sup> |
| Male                            | 9                | 60.00 | 8          | 53.33 |                    |
| Female                          | 6                | 40.00 | 7          | 46.67 |                    |
| Tumor location                  |                  |       |            |       | 0.456 <sup>b</sup> |
| Colon                           | 5                | 33.33 | 7          | 46.67 |                    |
| Rectum                          | 10               | 66.67 | 8          | 53.33 |                    |
| Tumor size                      |                  |       |            |       | 0.712 <sup>b</sup> |
| <4cm                            | 7                | 46.67 | 6          | 40.00 |                    |
| ≥4cm                            | 8                | 53.33 | 9          | 60.00 |                    |
| Differentiation                 |                  |       |            |       | 0.532 <sup>b</sup> |
| Well                            | 6                | 40.00 | 4          | 26.67 |                    |
| Moderate                        | 7                | 46.67 | 10         | 66.67 |                    |
| Poor                            | 2                | 13.33 | 1          | 6.67  |                    |
| Local invasion                  |                  |       |            |       | 0.690 <sup>b</sup> |
| T1-T2                           | 5                | 33.33 | 4          | 26.67 |                    |
| T3-T4                           | 10               | 66.67 | 11         | 73.33 |                    |
| Regional lymph nodes metastasis |                  |       |            |       | 0.256 <sup>b</sup> |
| No                              | 7                | 46.67 | 4          | 26.67 |                    |
| Yes                             | 8                | 53.33 | 11         | 73.33 |                    |

**Supplementary Table 2. The AUC, sensitivity and specificity of each exolncRNA for distinguishing diagnosis of colorectal cancer recurrence.**

| exolncRNA     | Cutoff value | AUC(95%IC)         | Sensitivity(%) | Specificity(%) |
|---------------|--------------|--------------------|----------------|----------------|
| AF079515      | 0.688        | 0.780(0.705-0.844) | 75.0           | 68.6           |
| CCAT1         | 0.335        | 0.740(0.662-0.808) | 97.5           | 37.1           |
| UCA1          | 0.265        | 0.754(0.677-0.820) | 85.0           | 51.4           |
| HOTTIP        | 0.312        | 0.614(0.531-0.692) | 33.8           | 91.4           |
| RP11-434B12.1 | 0.355        | 0.809(0.737-0.868) | 91.3           | 64.3           |
| 5-exolncRNAs  | 3.998        | 0.947(0.898-0.977) | 88.8           | 85.7           |

**Supplementary Table 3. Correlations between the risk scores of 5-exolncRNAs panel and clinicopathological characteristics.**

| Parameters                      | No. of patients | Risk scores of 5-exolncRNAs panel | P-value             |
|---------------------------------|-----------------|-----------------------------------|---------------------|
| Age                             |                 |                                   | 0.427 <sup>a</sup>  |
| <62                             | 101             | 4.13(2.62-4.77)                   |                     |
| ≥62 (median)                    | 102             | 4.08(2.63-4.94)                   |                     |
| Gender                          |                 |                                   | 0.214 <sup>a</sup>  |
| Male                            | 98              | 3.992(2.585-4.713)                |                     |
| Female                          | 105             | 4.207(2.714-4.915)                |                     |
| Tumor location                  |                 |                                   | 0.795 <sup>a</sup>  |
| Colon                           | 86              | 4.143(2.644-4.700)                |                     |
| Rectum                          | 117             | 4.070(2.550-4.796)                |                     |
| Tumor size                      |                 |                                   | 0.839 <sup>a</sup>  |
| <4cm                            | 126             | 4.135(2.513-4.786)                |                     |
| ≥4cm                            | 77              | 4.081(2.714-4.788)                |                     |
| Differentiation                 |                 |                                   | 0.675 <sup>b</sup>  |
| Well                            | 38              | 4.351(2.633-4.808)                |                     |
| Moderate                        | 111             | 4.005(2.528-4.767)                |                     |
| Poor                            | 54              | 4.206(2.628-4.783)                |                     |
| Local invasion                  |                 |                                   | 0.022 <sup>a</sup>  |
| T1-T2                           | 54              | 3.637(2.312-4.525)                |                     |
| T3-T4                           | 149             | 4.247(2.713-4.833)                |                     |
| Regional lymph nodes metastasis |                 |                                   | <0.001 <sup>a</sup> |
| No                              | 124             | 3.637(2.382-4.493)                |                     |
| Yes                             | 79              | 4.683(3.885-5.262)                |                     |
| Distant metastasis              |                 |                                   | <0.001 <sup>a</sup> |
| No                              | 163             | 3.885(2.469-4.649)                |                     |
| Yes                             | 40              | 4.811(4.248-5.326)                |                     |
| CEA levels                      |                 |                                   | 0.015 <sup>a</sup>  |
| <5 ng/ml                        | 116             | 4.054(2.484-4.493)                |                     |
| ≥5 ng/ml                        | 87              | 4.605(2.730-5.185)                |                     |
| CA19-9 levels                   |                 |                                   | 0.292 <sup>a</sup>  |
| <5 ng/ml                        | 178             | 4.081(2.612-4.757)                |                     |
| ≥5 ng/ml                        | 25              | 4.664(2.780-4.876)                |                     |

Note: Risk scores of 5-exolncRNAs panel were presented as median (interquartile range); P-value<sup>a</sup> was estimated by Mann-Whitney U test; P-value<sup>b</sup> was estimated by Kruskal-Wallis test.

**Supplementary Table 4. Univariate and multivariate Cox regression model analysis of RFS and OS in CRC patients.**

| Parameters            | Categories               | Univariate analysis  |         | Multivariate analysis |         |
|-----------------------|--------------------------|----------------------|---------|-----------------------|---------|
|                       |                          | HR (95% CI)          | P value | HR (95% CI)           | P value |
| <b>RFS</b>            |                          |                      |         |                       |         |
| Gender                | Female VS Male           | 0.814(0.561-1.180)   | 0.278   |                       |         |
| Age                   | <62y VS ≥62y             | 0.894(0.616-1.297)   | 0.556   |                       |         |
| Tumor location        | Colon VS Rectum          | 1.305(0.900-1.892)   | 0.160   |                       |         |
| Differentiation       | Well VS Moderate VS Poor | 0.964(0.726-1.279)   | 0.798   |                       |         |
| Tumor size            | <4cm VS ≥4cm             | 0.992(0.677-1.455)   | 0.969   |                       |         |
| Local invasion        | T1-T2 VS T3-T4           | 2.072(1.288-3.334)   | 0.003   | 1.059(0.645-1.739)    | 0.819   |
| Lymph node metastasis | Negative VS Positive     | 2.823(1.937-4.115)   | <0.001  | 1.685(1.113-2.552)    | 0.014   |
| Distant metastasis    | Negative VS Positive     | 3.729(2.451-5.675)   | <0.001  | 1.523(0.963-2.408)    | 0.072   |
| CEA                   | Negative VS Positive     | 1.307(0.895-1.908)   | 0.166   |                       |         |
| CA19-9                | Negative VS Positive     | 1.462(0.848-2.522)   | 0.172   |                       |         |
| 5-exolncRNAs panel    | Low VS High              | 14.742(8.325-26.104) | <0.001  | 12.240(6.704-22.348)  | <0.001  |
| <b>OS</b>             |                          |                      |         |                       |         |
| Gender                | Female VS Male           | 0.708(0.484-1.034)   | 0.074   |                       |         |
| Age                   | <62y VS ≥62y             | 1.269(0.871-1.848)   | 0.215   |                       |         |
| Tumor location        | Colon VS Rectum          | 1.175(0.805-1.714)   | 0.403   |                       |         |
| Differentiation       | Well VS Moderate VS Poor | 0.990(0.743-1.319)   | 0.945   |                       |         |
| Tumor size            | <4cm VS ≥4cm             | 1.376(0.942-2.008)   | 0.099   |                       |         |
| Local invasion        | T1-T2 VS T3-T4           | 1.884(1.170-3.035)   | 0.009   | 0.980(0.593-1.619)    | 0.937   |
| Lymph node metastasis | Negative VS Positive     | 4.440(2.999-6.576)   | <0.001  | 2.491(1.626-3.816)    | <0.001  |
| Distant metastasis    | Negative VS Positive     | 4.682(3.114-7.040)   | <0.001  | 1.642(1.062-2.540)    | 0.026   |
| CEA                   | Negative VS Positive     | 1.396(0.808-2.409)   | <0.001  | 3.442(2.186-5.419)    | <0.001  |
| CA19-9                | Negative VS Positive     | 2.164(1.482-3.160)   | 0.231   |                       |         |
| 5-exolncRNAs panel    | Low VS High              | 9.182(5.355-15.743)  | <0.001  | 10.649(5.669-20.004)  | <0.001  |

**Supplementary Table 5. Primer sequences for real-time PCR.**

| <b>Primer</b>   | <b>Sequence</b>               | <b>Product length</b> |
|-----------------|-------------------------------|-----------------------|
| AF079515-F      | 5'- ATCAACCCCTCAACTATCACA -3' | 122 bp                |
| AF079515-R      | 5'- GCTATGTACGGTAAATGG -3'    |                       |
| AC004854.4-F    | 5'- ATTTGGAGGATAACTCCCAGC -3' | 78 bp                 |
| AC004854.4-R    | 5'- TTTTACAACAGCTTCCGGGG -3'  |                       |
| CCAT1-F         | 5'- GCCGTGTTAAGCATTGCGAA -3'  | 168 bp                |
| CCAT1-R         | 5'- TCATGTCTCGGCACCTTTCC -3'  |                       |
| UCA1-F          | 5'- TGCCAGCCTCAGCTTAATCC -3'  | 153 bp                |
| UCA1-R          | 5'- TCCCTGTTGCTAAGCCGATG -3'  |                       |
| LOC100268168-F  | 5'- ACACATCCCCACTCACGTTC -3'  | 133 bp                |
| LOC100268168-R  | 5'- CTTGCCGGAAACAATGTGGG -3'  |                       |
| RP4-669L17.4-F  | 5'- AAATGATTCAACAGGAGGAG -3'  | 132 bp                |
| RP4-669L17.4-R  | 5'- TCTTTGTATCGGTGCTCAG -3'   |                       |
| HOTTIP -F       | 5'- CCTAAAGCCACGCTTCTTTG -3'  | 142 bp                |
| HOTTIP -R       | 5'- TGCAGGCTGGAGATCCTACT -3'  |                       |
| AK094859-F      | 5'- GGGCAGGTGTTATGTTTCTT -3'  | 197 bp                |
| AK094859-R      | 5'- CTGGGCTGGATATTTGGT -3'    |                       |
| RP11-38P22.2-F  | 5'- ACATCCATTGTTGGGGCCTT-3'   | 70 bp                 |
| RP11-38P22.2-R  | 5'- GATTTACAGGCTCCTGGCT-3'    |                       |
| CHRND -F        | 5'- ATGGTGTGGCTCCCAGAGAT -3'  | 93 bp                 |
| CHRND -R        | 5'- GCCGTAGTGGTAGACAAGCA-3'   |                       |
| BC005081-F      | 5'- TGACGCCAATCTCTTGGTCC -3'  | 72 bp                 |
| BC005081-R      | 5'- TGTCAGGTATCCCCCACCT -3'   |                       |
| RP11-434B12.1-F | 5'- GGCGTGGTTATGTGGAGTTG -3'  | 194 bp                |
| RP11-434B12.1-R | 5'- TTCAAACACGGCAAGCCATT -3'  |                       |
| PHLDA3-F        | 5'- GAATGGCCTCTGGACTCACC -3'  | 137 bp                |
| PHLDA3-R        | 5'- GAGGTGGGGGAAGAAGTGTG -3'  |                       |
| HMGA1P4-F       | 5'- AAGCCCCATCTCATCCTAGC-3'   | 78 bp                 |
| HMGA1P4-R       | 5'- AATAAGCACCCCCGCAGATG -3'  |                       |
| RP3-523K23.2-F  | 5'- AAGTTGCTGTGTGGAGCAGT -3'  | 210 bp                |
| RP3-523K23.2-R  | 5'- TGTGGGTTCTGGGCTTTGTT -3'  |                       |
| BC044655.1-F    | 5'- GGCTGGCCTGGTTATTTCAA -3'  | 111 bp                |
| BC044655.1-R    | 5'- AGGCTCCAAGAAGGCAAGTA -3'  |                       |
| FW340055-F      | 5'- CTCCTTTGGCCATTGCAGTC-3'   | 110 bp                |
| FW340055-R      | 5'- ATTCCAAGGTTGGGAGGGAG-3'   |                       |
| GAPDH-F         | 5'-TGCACCACCAACTGCTTAGC-3'    | 87 bp                 |
| GAPDH-R         | 5'-GGCATGGACTGTGGTCATGAG-3'   |                       |
| UBC-F           | 5'-CCGGGATTTGGGTTCGAG-3'      | 70 bp                 |
| UBC-R           | 5'-TCACGAAGATCTGCATTGTCAAG-3' |                       |
